# Supplementary material for: Cdt1p, through its interaction with Mcm6p, is required for the formation, nuclear accumulation and chromatin loading of the MCM complex
Source: Oxford University Press journal article supplement (doi:10.1242/jcs.094169), 2012-01-01
Supplement: jcs094169tables2.pdf [file jcs094169tables2.pdf]

**Table S2. Plasmids**

| <b>Plasmid</b> | <b>Description</b>                                 |
|----------------|----------------------------------------------------|
| PL1808         | pGBKT7-Cdt1                                        |
| PL1809         | pGBKT7-Cdt1N (1-421aa)                             |
| PL1810         | pGBKT7-Cdt1C (422-604aa)                           |
| PL1843         | pGBKT7- Cdt1-5A(R486A, R488A, R490A, R501A, K512A) |
| PL1874         | pGBKT7-Cdt1-5AC (422-604aa)                        |
| PL1820         | pESC-Cdt1-FLAG (HIS3)                              |
| PL1835         | pESC-Cdt1N-FLAG (HIS3)                             |
| PL1821         | pESC-Cdt1C-FLAG (HIS3)                             |
| PL1815         | pGADT7-Mcm6                                        |
| PL1818         | pGADT7-Mcm6N (1-914aa)                             |
| PL1819         | pGADT7-Mcm6C (915-1017aa)                          |
| PL1850         | pGADT7-Mcm6-5A(E945A, D947A, L949A, E951A, Y954A)  |
| PL1872         | pGADT7-Mcm6C-5A (915-1017aa)                       |
| PL1825         | pESC-His-Mcm6-FLAG (HIS3)                          |
| PL1838         | pESC-Mcm6N-FLAG (HIS3)                             |
| PL1827         | pESC-Mcm6C-FLAG (HIS3)                             |
